# Supplementary material for: On the impact of isomer structure and packing disorder in thienoacene organic semiconductors
Source: Royal Society of Chemistry journal article supplement (doi:10.1039/c5tc03900b), 2016-01-01
Supplement: c5tc03900b1.pdf [file c5tc03900b1.pdf]

## Supporting Information

### **On the Impact of Isomer Structure and Packing Disorder in Thienoacene Organic Semiconductors**

**Karl J. Thorley and Chad Risko\***

*Department of Chemistry &  
Center for Applied Energy Research  
University of Kentucky  
Lexington, Kentucky 40506-0055 USA*

\* Corresponding author: [chad.risko@uky.edu](mailto:chad.risko@uky.edu)

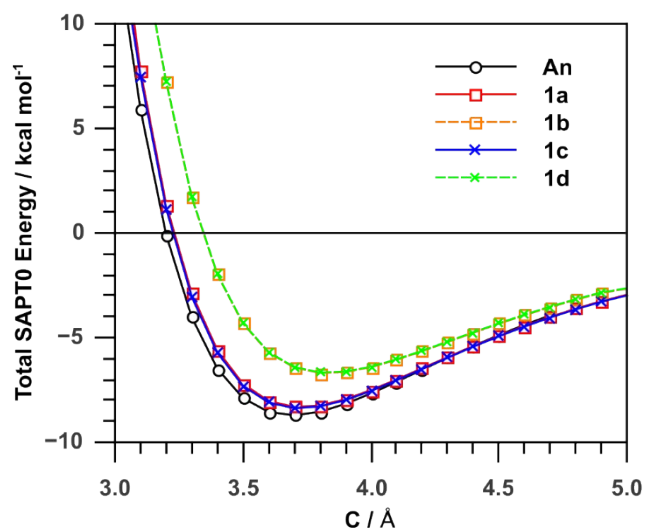

Figure S1. Total SAPT0/jun-cc-pVDZ interaction energies for anthracene as a function of the plane-to-plane  $C$ -distance. Data for ordered and disordered *anti*- and *syn*-BDT is repeated from the main manuscript for comparison.

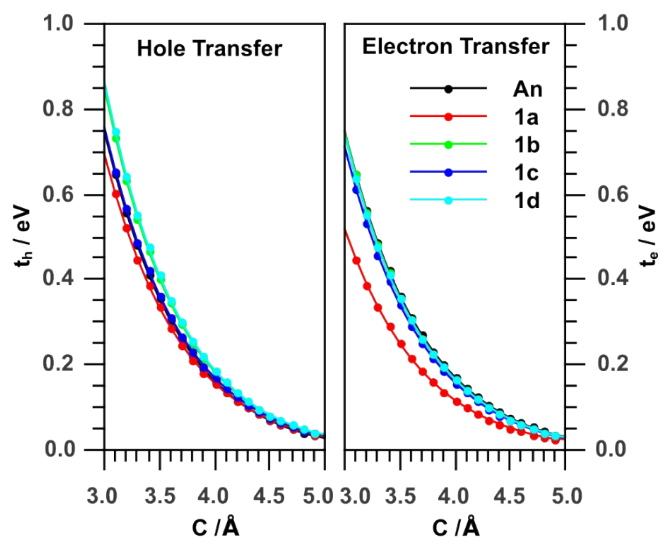

Figure S2. Transfer integrals for holes ( $t_h$ , left) and electrons ( $t_e$ , right) for anthracene as a function of intermolecular separation as determined at the B3LYP/6-31G(d) level of theory. Data for ordered and disordered *anti*- and *syn*-BDT is repeated from the main manuscript for comparison.

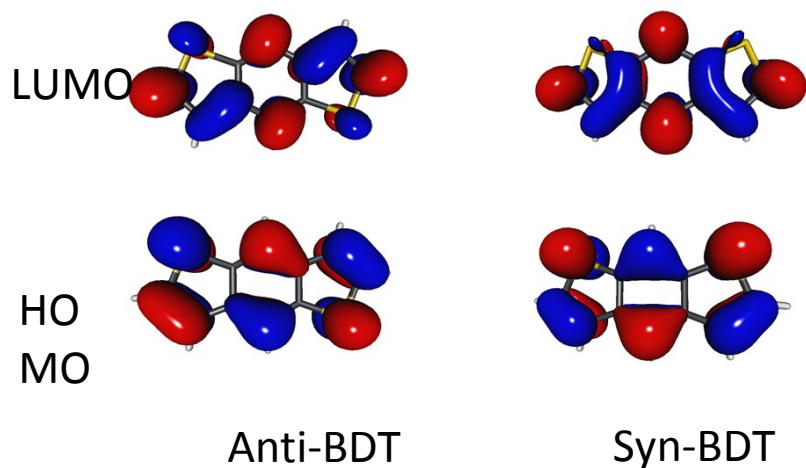

Figure S3. Pictorial representation of the HOMO and LUMO for (left) *anti*- and (right) *syn*-BDT as determined at the B3LYP/6-31G(d) level of theory.

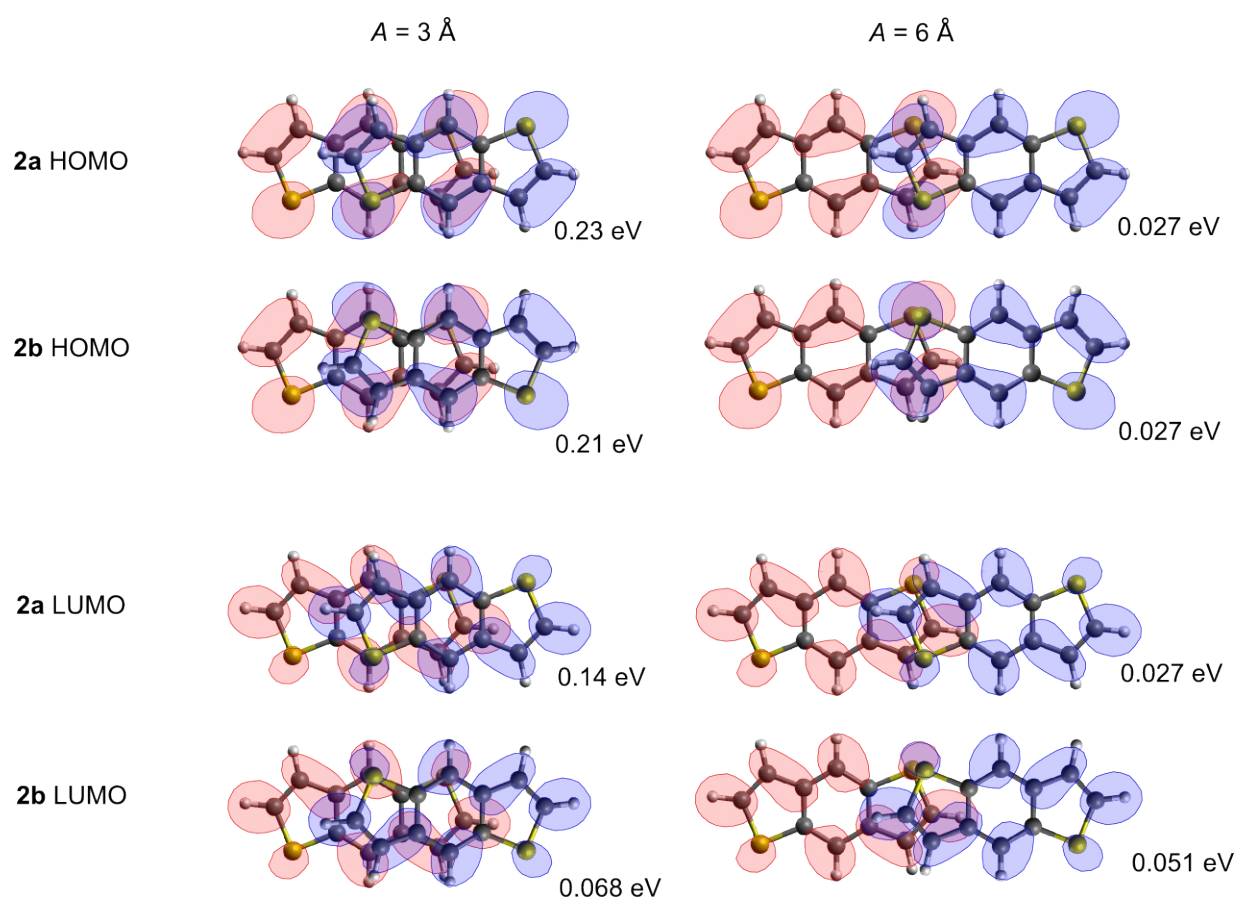

Figure S4. Selected  $A$  displacements of the *anti*-BDT disordermer pairs 2a and 2b showing the orbital overlap and calculated intermolecular electronic couplings as determined at the B3LYP/6-31G(d) level of theory. The (dimer) molecular orbitals are displayed such that the blue orbitals belong to the top molecule and the red orbitals to the bottom molecule in the stack.

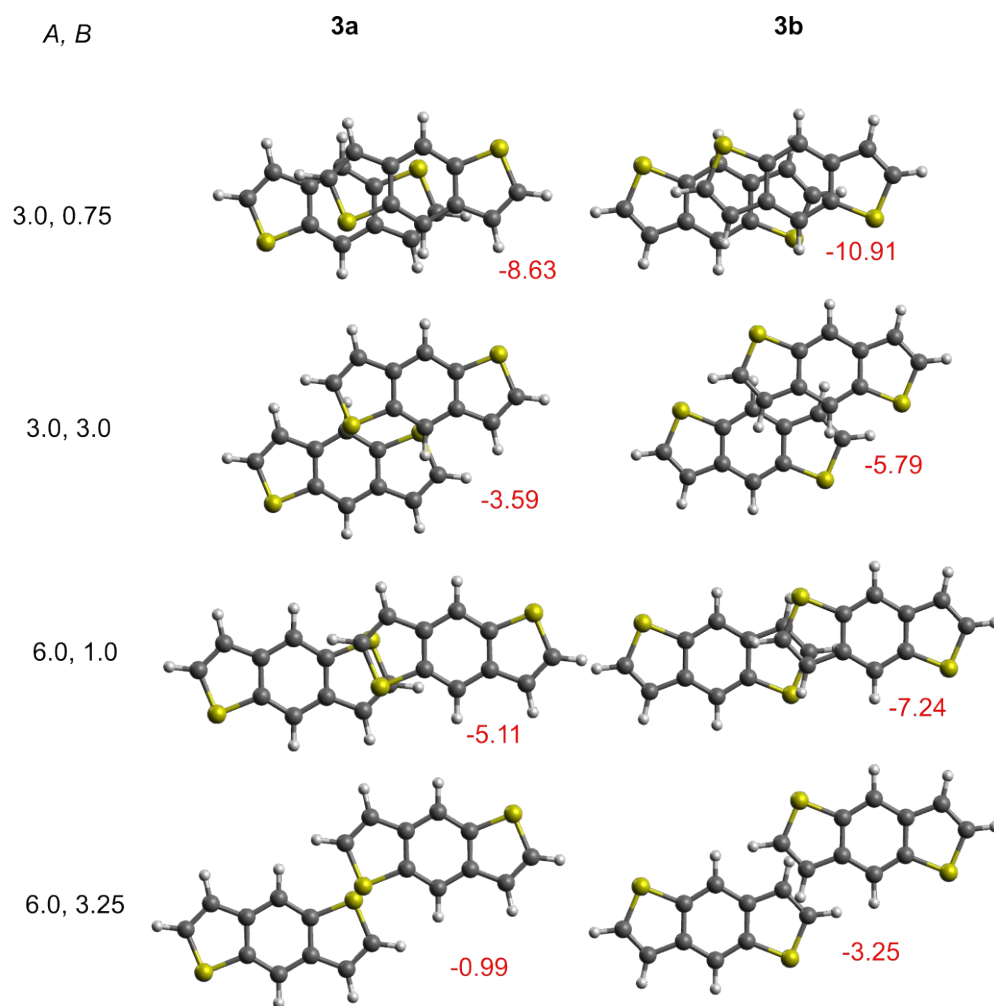

**Figure S5.** Molecular alignments from *A, B* displacements in Table 1 of the main manuscript for disordermer pairs 3a and 3b, highlighting the contacts involving sulfur. SAPT0/ jun-cc-pVDZ interaction energies are given in red in kcal mol<sup>-1</sup>.

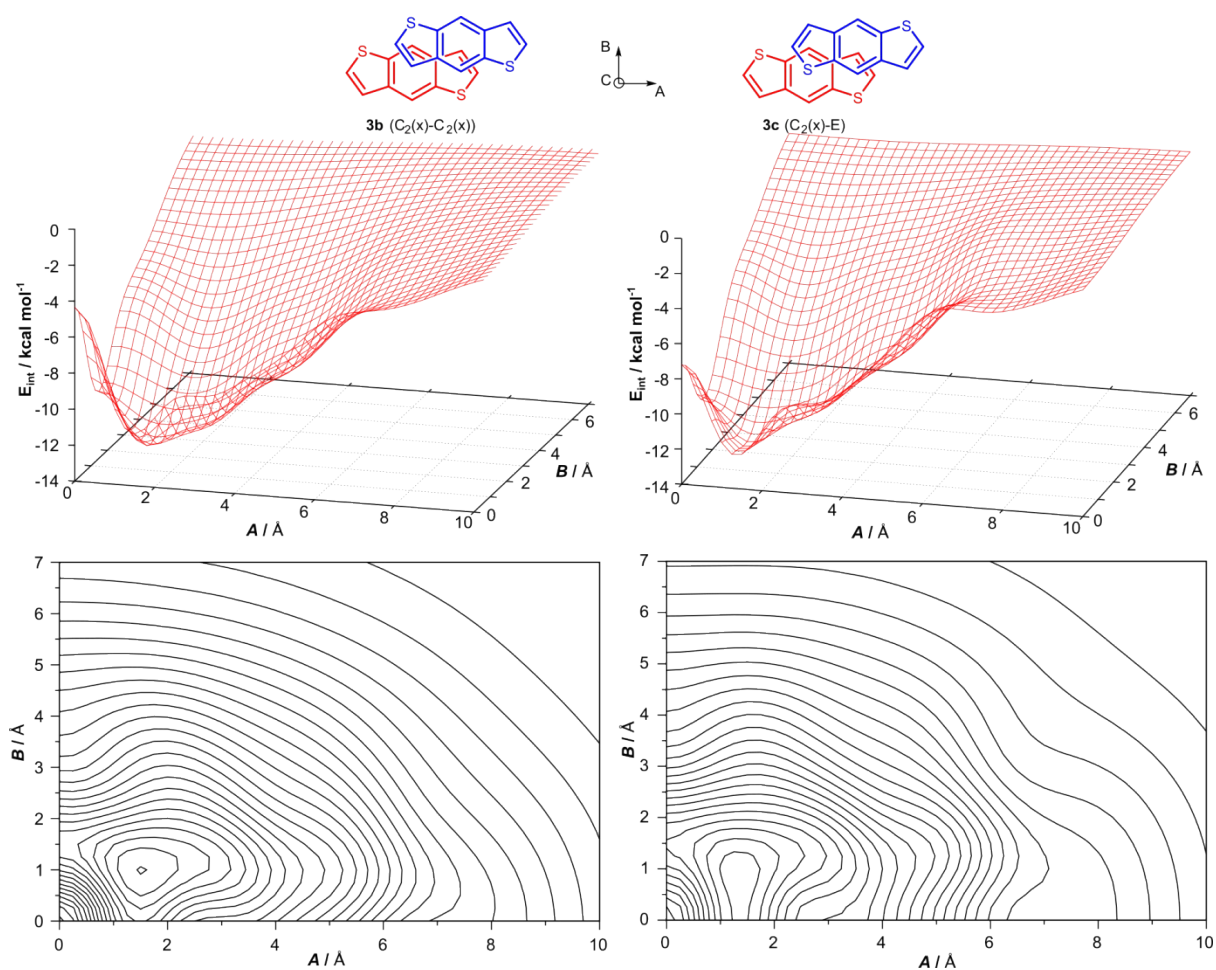

**Figure S6.** 3D surface (top) and contour (bottom) plots of the SAPT0/ jun-cc-pVDZ interaction energy as a function of  $A$  and  $B$  displacement for *anti*-BDT disordermer pairs 3b (left) and 3c (right). Contour lines represent changes in energy of 0.5 kcal mol<sup>-1</sup>.

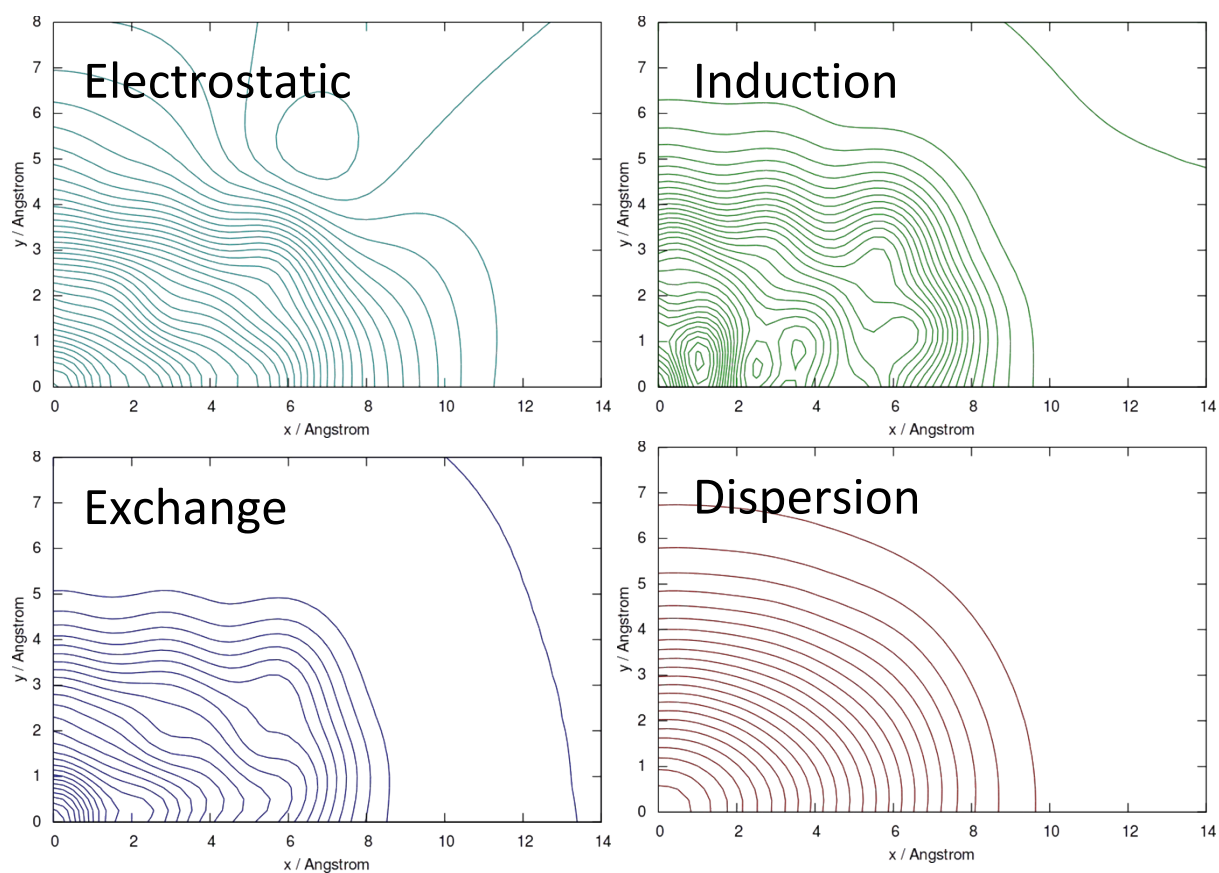

**Figure S7.** SAPT0/ jun-cc-pVDZ component energies  $E_{\text{elec}}$  (contour = 0.2 kcal mol<sup>-1</sup>),  $E_{\text{ind}}$  (contour = 0.05 kcal mol<sup>-1</sup>),  $E_{\text{exch}}$  (contour = 1 kcal mol<sup>-1</sup>), and  $E_{\text{disp}}$  (contour = 1 kcal mol<sup>-1</sup>) for disordermer pair 3a as a function of  $A$  and  $B$  displacement.  $C$  displacement is constant at 3.5 Å.

**Table S1.** SAPT0/ jun-cc-pVDZ energies for disordermer pairs of *syn* and *anti*-BDT with one molecule rotated by the angle  $\theta$ . These are equivalent to one molecule rotated by 45°, and then applying a disorder transformation as described in the table. All energies are in kcal mol<sup>-1</sup> and angles in degrees.

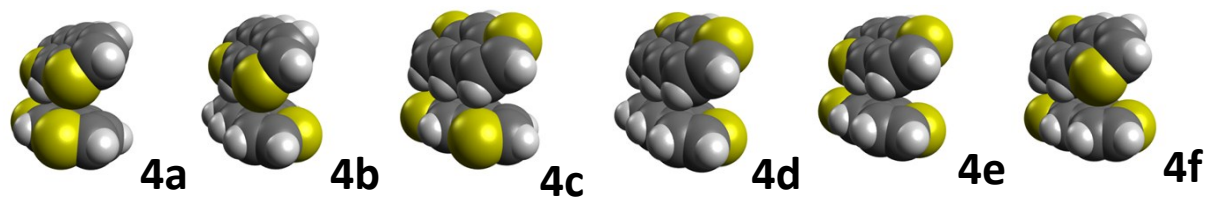

|                                    | <i>Syn</i> -BDT |                  |                   |                                | <i>Anti</i> -BDT |                   |
|------------------------------------|-----------------|------------------|-------------------|--------------------------------|------------------|-------------------|
|                                    | <b>4a</b>       | <b>4b</b>        | <b>4c</b>         | <b>4d</b>                      | <b>4e</b>        | <b>4f</b>         |
| $\theta$                           | 45              | 135              | 225               | 315                            | 45/315           | 135/225           |
| Disordermers                       | E-E             | E-C <sub>2</sub> | C <sub>2</sub> -E | C <sub>2</sub> -C <sub>2</sub> | E-E              | C <sub>2</sub> -E |
| $E_{\text{elec}}$                  | -3.39           | -2.45            | -3.38             | -1.56                          | -2.48            | -2.91             |
| $E_{\text{exch}}$                  | 11.17           | 9.32             | 8.15              | 6.44                           | 8.78             | 8.73              |
| $E_{\text{ind}}$                   | -1.19           | -0.92            | -1.16             | -0.83                          | -1.01            | -1.06             |
| $E_{\text{disp}}$                  | -11.77          | -11.35           | -10.49            | -10.10                         | -10.94           | -10.94            |
| <b><math>E_{\text{int}}</math></b> | <b>-5.18</b>    | <b>-5.41</b>     | <b>-6.88</b>      | <b>-6.05</b>                   | <b>-5.65</b>     | <b>-6.18</b>      |
